# Supplementary material for: Construction and validation of the Oxford Neurodevelopment Assessment (OX-NDA) in 1-year-old Brazilian children
Source: PubMed Central journal article supplement (PMC9783969; doi:10.1186/s12887-022-03794-1), 2022-12-23
Supplement: 12887_2022_3794_MOESM2_ESM.pdf [file 12887_2022_3794_MOESM2_ESM.pdf]

## ADDITIONAL FILE 2

Table S2 Mapping analysis of International Developmental Assessments for Infants Aged 12 Months.

| Developmental Domains                                                                                               | ECD Conceptual constructs            | ECD Conceptual elements contained in 10-14 month battery |                   |                        |                   |                   |                      |                   |                     |                      |                    |                      |                    |                    |                       |                      |                     |
|---------------------------------------------------------------------------------------------------------------------|--------------------------------------|----------------------------------------------------------|-------------------|------------------------|-------------------|-------------------|----------------------|-------------------|---------------------|----------------------|--------------------|----------------------|--------------------|--------------------|-----------------------|----------------------|---------------------|
|                                                                                                                     |                                      | BSID-III <sup>1</sup>                                    | MDAT <sup>2</sup> | Griffiths <sup>3</sup> | CBCL <sup>4</sup> | RNDA <sup>5</sup> | ASQ-III <sup>6</sup> | PEDS <sup>7</sup> | CRE-DI <sup>8</sup> | DDST-II <sup>9</sup> | GMCD <sup>10</sup> | DAS-II <sup>11</sup> | TADI <sup>12</sup> | IYCD <sup>13</sup> | BDI-2 <sup>14,a</sup> | MSEL <sup>15,a</sup> | CDIIT <sup>16</sup> |
| <b>Conceptual constructs according to OX-NDA working group's neurodevelopmental matrix (Age Band: 10-14 months)</b> |                                      |                                                          |                   |                        |                   |                   |                      |                   |                     |                      |                    |                      |                    |                    |                       |                      |                     |
| Cognitive                                                                                                           | Comprehension of simple instructions |                                                          |                   |                        |                   |                   |                      |                   |                     |                      |                    |                      |                    |                    |                       |                      |                     |
|                                                                                                                     | Constructional skills                |                                                          |                   |                        |                   |                   |                      |                   |                     |                      |                    |                      |                    |                    |                       |                      |                     |
|                                                                                                                     | Comprehends concept of 'one'         |                                                          |                   |                        |                   |                   |                      |                   |                     |                      |                    |                      |                    |                    |                       |                      |                     |
|                                                                                                                     | Object permanence                    |                                                          |                   |                        |                   |                   |                      |                   |                     |                      |                    |                      |                    |                    |                       |                      |                     |
|                                                                                                                     | Basic problem solving skills         |                                                          |                   |                        |                   |                   |                      |                   |                     |                      |                    |                      |                    |                    |                       |                      |                     |
|                                                                                                                     | Object matching/sorting              |                                                          |                   |                        |                   |                   |                      |                   |                     |                      |                    |                      |                    |                    |                       |                      |                     |
|                                                                                                                     | Pretend play                         |                                                          |                   |                        |                   |                   |                      |                   |                     |                      |                    |                      |                    |                    |                       |                      |                     |
| Motor                                                                                                               | Pincer grasp and grasp release       |                                                          |                   |                        |                   |                   |                      |                   |                     |                      |                    |                      |                    |                    |                       |                      |                     |
|                                                                                                                     | Transfer of objects between hands    |                                                          |                   |                        |                   |                   |                      |                   |                     |                      |                    |                      |                    |                    |                       |                      |                     |
|                                                                                                                     | Walks with support/alone             |                                                          |                   |                        |                   |                   |                      |                   |                     |                      |                    |                      |                    |                    |                       |                      |                     |
|                                                                                                                     | Stands alone                         |                                                          |                   |                        |                   |                   |                      |                   |                     |                      |                    |                      |                    |                    |                       |                      |                     |
|                                                                                                                     | Motor coordination                   |                                                          |                   |                        |                   |                   |                      |                   |                     |                      |                    |                      |                    |                    |                       |                      |                     |
| Language                                                                                                            | 2-4 syllable babble                  |                                                          |                   |                        |                   |                   |                      |                   |                     |                      |                    |                      |                    |                    |                       |                      |                     |
|                                                                                                                     | 1 meaningful word                    |                                                          |                   |                        |                   |                   |                      |                   |                     |                      |                    |                      |                    |                    |                       |                      |                     |

|                    |                              |  |  |  |  |  |  |  |  |  |  |  |  |  |  |  |  |
|--------------------|------------------------------|--|--|--|--|--|--|--|--|--|--|--|--|--|--|--|--|
|                    | 2 words together             |  |  |  |  |  |  |  |  |  |  |  |  |  |  |  |  |
|                    | Preverbal gesture            |  |  |  |  |  |  |  |  |  |  |  |  |  |  |  |  |
|                    | Comprehends own name         |  |  |  |  |  |  |  |  |  |  |  |  |  |  |  |  |
|                    | Comprehends concept of 'no'  |  |  |  |  |  |  |  |  |  |  |  |  |  |  |  |  |
| Executive Function | Multi-step problem solving   |  |  |  |  |  |  |  |  |  |  |  |  |  |  |  |  |
|                    | Demonstrates means to an end |  |  |  |  |  |  |  |  |  |  |  |  |  |  |  |  |
|                    | Empathy                      |  |  |  |  |  |  |  |  |  |  |  |  |  |  |  |  |
| Behaviour          | Positive behavior attributes |  |  |  |  |  |  |  |  |  |  |  |  |  |  |  |  |
|                    | Negative behavior attributes |  |  |  |  |  |  |  |  |  |  |  |  |  |  |  |  |
|                    | Emotional lability           |  |  |  |  |  |  |  |  |  |  |  |  |  |  |  |  |
|                    | Emotional regulation         |  |  |  |  |  |  |  |  |  |  |  |  |  |  |  |  |
|                    | Curiosity                    |  |  |  |  |  |  |  |  |  |  |  |  |  |  |  |  |

**ECD Conceptual elements as per WHO IYCD indicators (Age Band: 12.1-18.0 months)**

|                  |                                     | BSID-III <sup>1</sup> | MDAT <sup>2</sup> | Griffiths <sup>3</sup> | CBCL <sup>4</sup> | RNDA <sup>5</sup> | ASQ-III <sup>6</sup> | PEDS <sup>7</sup> | CRE-DI <sup>8</sup> | DDST-II <sup>9</sup> | GMCD <sup>10</sup> | DAS-II <sup>11</sup> | TADI <sup>12</sup> | IYCD <sup>13</sup> | BDI-2 <sup>14,a</sup> | MSEL <sup>15,a</sup> | CDIIT <sup>16</sup> |
|------------------|-------------------------------------|-----------------------|-------------------|------------------------|-------------------|-------------------|----------------------|-------------------|---------------------|----------------------|--------------------|----------------------|--------------------|--------------------|-----------------------|----------------------|---------------------|
| Cognitive        | Object sorting                      |                       |                   |                        |                   |                   |                      |                   |                     |                      |                    |                      |                    |                    |                       |                      |                     |
| Motor            | Matured motor coordination          |                       |                   |                        |                   |                   |                      |                   |                     |                      |                    |                      |                    |                    |                       |                      |                     |
| Language         | Use of at least two to four words   |                       |                   |                        |                   |                   |                      |                   |                     |                      |                    |                      |                    |                    |                       |                      |                     |
| Social-emotional | Stranger anxiety                    |                       |                   |                        |                   |                   |                      |                   |                     |                      |                    |                      |                    |                    |                       |                      |                     |
|                  | Self control/delay in gratification |                       |                   |                        |                   |                   |                      |                   |                     |                      |                    |                      |                    |                    |                       |                      |                     |
|                  | Emergence of compliance             |                       |                   |                        |                   |                   |                      |                   |                     |                      |                    |                      |                    |                    |                       |                      |                     |

## Legend:

|   |                                                      |
|---|------------------------------------------------------|
| ■ | Specific construct clearly present                   |
| ■ | Related construct present                            |
| ■ | General overview of parental concern only            |
| ■ | Construct not present                                |
| ■ | Unable to assess as information not freely available |

<sup>1</sup>BSID-III: Bayley Scales of Infant and Toddler Development, Third Edition (Bayley-III); ©Pearson. Available from: <http://www.pearsonclinical.co.uk>

<sup>2</sup>MDAT: The Malawi Developmental Assessment Tool; Gladstone M, Lancaster GA, Umar E, Nyirenda M, Kayira E, van den Broek NR, Smyth RL. The Malawi Developmental Assessment Tool (MDAT): the creation, validation, and reliability of a tool to assess child development in rural African settings. *PLoS medicine* 2010; **7**: e1000273.

<sup>3</sup>Griffiths: Griffiths Mental Development Scales; Luiz D, Barnard A, Knoesen N, Kotras N, Horrocks S, McAlinden P, Challis D, O'Connell R. Griffiths Mental Development Scales—Extended Revised: Two to Eight Years: Administration Manual. Hogrefe, Oxford, UK 2006.

<sup>4</sup>CBCL: Preschool Child Behavior Checklist; Achenbach TM. Manual for the Child Behavior Checklist/4-18 and 1991 profile. University of Vermont, Department of Psychiatry 1991.

<sup>5</sup>RNDA: Rapid Neurodevelopmental Assessment; Khan NZ, Muslima H, Begum D, Shilpi AB, Akhter S, Bilkis K, Begum N, Parveen M, Ferdous S, Morshed R, Batra M. Validation of rapid neurodevelopmental assessment instrument for under-two-year-old children in Bangladesh. *Pediatrics*. 2010 Apr 1;125(4):e755-62.

<sup>6</sup>ASQ-III: Ages & Stages Questionnaires®, Third Edition; <https://agesandstages.com/products-pricing/asq3/>

<sup>7</sup>PEDS: Parents' Evaluation of Developmental Status. Glascoe FP. Collaborating with parents: Using Parents' Evaluation of Developmental Status to detect and address developmental and behavioral problems. Ellsworth & Vandermeer Press; 1998. Available at: <http://forepath.org/>.

<sup>8</sup>CREDI: Caregiver Reported Early Developmental Instruments; McCoy DC, Waldman M, Team CF, Fink G. Measuring early childhood development at a global scale: evidence from the Caregiver-Reported early development instruments. *Early childhood research quarterly*. 2018 Oct 1;45:58-68. <https://sites.sph.harvard.edu/credi/>

<sup>9</sup>DDST-II: The Denver Developmental Screening Test IIInd edition; Frankenburg WK, Dodds J, Archer P, Shapiro H, Bresnick B. The Denver II: a major revision and restandardization of the Denver Developmental Screening Test. *Pediatrics* 1992; **89**: 91-7.

<sup>10</sup>GMCD: A Guide for Monitoring Child Development; Ertem IO, Dogan DG, Gok CG, Kizilates SU, Caliskan A, Atay G, Vatandas N, Karaaslan T, Baskan SG, Cicchetti DV. A guide for monitoring child development in low-and middle-income countries. *Pediatrics* 2008; **121**: e581-9.

<sup>11</sup>DASII: Developmental Assessment Scales for Indian Infants; Phatak P. Mental and Motor Growth of Indian Babies (1 Month-30 Months).(Longitudinal Growth of Indian Children). Final Report. <https://www.manashakti.org/tests/developmental-assessment-scales-indian-infants>

<sup>12</sup>TADI: Test de Aprendizaje y Desarrollo Infantil; López Vanegas, N. y Peñafiel Aguirre, T. (2020). Adaptación y validación del test de Aprendizaje y desarrollo infantil "TADI" en el GAD de Calderón. Trabajo de titulación previo a la obtención del Título de Psicólogo Infantil y Psicorehabilitación. Carrera de Psicología Infantil y Psicorehabilitación. Quito: UCE. 190 p.

<http://www.dspace.uce.edu.ec/bitstream/25000/20829/1/T-UCE-0007-CPS-245.pdf>

<sup>13</sup>IYCD: WHO Indicators of Infant and Young Child Development; Lancaster GA, McCray G, Kariger P, *et al.* Creation of the WHO Indicators of Infant and Young Child Development (IYCD): metadata synthesis across 10 countries. *BMJ Glob Health* 2018; **3**:e000747.

<sup>14</sup>BDI-2: Battelle's Development Inventory 2; Newborg, J., Stock, J.R., Wnek, L., Guidabaldi, J., & Svinicki, J. (1984). Battelle Developmental Inventory Screening Test. Allen Texas: DLM-Teaching Resources.

<sup>15</sup>MSEL: Mullen's Scales of Early Learning; Mullen, E. *Mullen Scales of Early Learning*. Circle Pines, NM: American Guidance Service 1995.

<sup>16</sup>CDIIT: Comprehensive Developmental Inventory for Infants and Toddlers; Hwang AW, Weng LJ, Liao HF. Construct validity of the comprehensive developmental inventory for infants and toddlers. *Pediatrics international*. 2010 Aug; **52**(4): 598-606.

<sup>a</sup> Instrument's commercialization partner contacted for information about the tool, response not obtained.
