# Supplementary material for: Construction and validation of the Oxford Neurodevelopment Assessment (OX-NDA) in 1-year-old Brazilian children
Source: PubMed Central journal article supplement (PMC9783969; doi:10.1186/s12887-022-03794-1), 2022-12-23
Supplement: 12887_2022_3794_MOESM3_ESM.pdf [file 12887_2022_3794_MOESM3_ESM.pdf]

### ADDITIONAL FILE 3

Table S3 OX-NDA Items and Scoring Options.

| No | Item                                                                                                                                                                                                                                                                   | Options                                          |                                                                                                       |                                                         |            |                  |
|----|------------------------------------------------------------------------------------------------------------------------------------------------------------------------------------------------------------------------------------------------------------------------|--------------------------------------------------|-------------------------------------------------------------------------------------------------------|---------------------------------------------------------|------------|------------------|
| 1  | Builds a tower of 3 cubes<br><i>(Trials = 5, demonstration = 5)</i>                                                                                                                                                                                                    | 3 cubes in ≤3 trials                             | 3 cubes in 4-5 trials                                                                                 | 2 cubes in 5 trials                                     | No attempt | Unable to assess |
| 2  | Takes 3 cubes out of cup (Examiner says "Look, I am putting the cubes into the cup – one, two and three. Can you take them out?")<br><i>(Trials = 3, demonstration = 0 but visibly place cubes inside cup before asking child to take them out counting as you go)</i> | Takes all 3 cubes out of the cup in ≤3 trials    | Takes 2 cubes out of cup                                                                              | Takes 1 cube out of cup                                 | No attempt | Unable to assess |
| 3  | Puts 3 cubes back in cup (Examiner says "Can you put the cubes back in the cup?")<br><i>(Trials = 3, demonstration = 0)</i>                                                                                                                                            | Puts all 3 cubes inside cup in ≤3 trials         | Puts 2 cubes inside cup in ≤3 trials                                                                  | Puts 1 cube inside cup in ≤3 trials                     | No attempt | Unable to assess |
| 4  | Hands the examiner one cube when asked to do so (Examiner says "Please can you give me 1 cube?")<br><i>(Trials = 1, demonstration = 0)</i>                                                                                                                             | Precise release of one cube into examiner's hand | Clumsy release, cube falls out of examiner's or child's hand, child gives examiner more than one cube | Attempts but unsuccessful release with one or more hand | No attempt | Unable to assess |
| 5  | Squeeze toy to make sound<br><i>(trials = 1, demonstration = 2 squeezes followed by 2 squeezes)</i>                                                                                                                                                                    | Squeezes toy to make sound                       | Squeezes toy but not hard enough to make sound                                                        | Picks up toy and plays with it but does not squeeze it  | No attempt | Unable to assess |
| 6  | Drop squeeze toy on floor (Examiner says "Uh oh, where's ducky                                                                                                                                                                                                         | Child looks                                      | Child looks                                                                                           | Child                                                   | Child does | Unable to        |

|    |                                                                                                                                                                       |                                                          |                                                                   |                                                                   |                                             |                  |
|----|-----------------------------------------------------------------------------------------------------------------------------------------------------------------------|----------------------------------------------------------|-------------------------------------------------------------------|-------------------------------------------------------------------|---------------------------------------------|------------------|
|    | gone?")<br>( <i>trials = 5 following verbal prompts, demonstration = 0</i> )                                                                                          | towards object or tries to retrieves it spontaneously    | towards object or tries to retrieve it in $\leq 3$ prompts        | starts looking for fallen toy on repeated prompting (4-5 prompts) | not look for toy even on repeated prompting | assess           |
| 7  | Finds squeeze toy under cup (Examiner hides toy under cup and says 'Where's ducky gone now?')<br>( <i>trials = 1, demonstration = 0; verbal prompts = maximum 3</i> ) | Child retrieves toy spontaneously by inverting cup       | Child pushes cup or points to cup but does not retrieve toy       | Child looks at cup but does not touch it                          | No attempt                                  | Unable to assess |
| 8  | Ask child to give squeeze toy to mummy<br>( <i>trials = 5, demonstration = 0</i> )                                                                                    | Child gives toy to mother in $\leq 3$ trials             | Child gives toy to mother with repeated prompting i.e. 4-5 trials | Child does not give toy to mother or gives it and takes it back   | No attempt                                  | Unable to assess |
| 9  | Identifies spoon out of 5 objects. Examiner says, "Which one is the spoon?"<br>( <i>trials = 5, demonstration = 0</i> )                                               | Child correctly identifies spoon in $\leq 3$ trials      | Child identifies spoon with repeated prompting i.e. 4-5 trials    | Child identifies an object but it is not the spoon                | No attempt                                  | Unable to assess |
| 10 | Identifies sock and toothbrush out of 5 objects. Examiner says, "Show me the sock and the toothbrush".<br>( <i>trials = 3, demonstration = 0</i> )                    | Child correctly identifies sock and toothbrush correctly | Child identifies one object correctly                             | Child attempts to identify objects but none are correct           | No attempt                                  | Unable to assess |

|    |                                                                                                                                                    |                                                               |                                                                  |                                                         |                                                |                  |
|----|----------------------------------------------------------------------------------------------------------------------------------------------------|---------------------------------------------------------------|------------------------------------------------------------------|---------------------------------------------------------|------------------------------------------------|------------------|
| 11 | Pretends to drink from a toy tea cup when placed in front of him/her<br>(Trials = 2, demonstration = 1 if not spontaneous on first attempt)        | Spontaneously                                                 | After 1 demonstration                                            | Partial attempt after 1 demonstration                   | No attempt                                     | Unable to assess |
| 12 | Lifts empty cup by handle<br>(if not concurrently observed with item above; demonstration=1, trial = 1)                                            | Lifts cup to mouth by handle using one hand with pincer grasp | Lifts cup to mouth using one hand with full hand grasp           | Lifts cup to mouth using both hands – full grasp        | Touches cup but does not lift it or no attempt | Unable to assess |
| 13 | Feeds doll when requested to. Examiner says, "Can you feed dolly some tea?"<br>(Trials = 2, demonstration = 1 if not spontaneous on first attempt) | Spontaneously                                                 | After 1 demonstration                                            | Partial attempt after 1 demonstration                   | No attempt                                     | Unable to assess |
| 14 | Matches shapes in puzzle (objects in 1 line)<br>(Trials = 5, demonstration = 0)                                                                    | All shapes in $\leq 3$ trials                                 | All shapes in 4-5 trials                                         | 1 or 2 shapes                                           | No attempt                                     | Unable to assess |
| 15 | Matches shapes on rotated puzzle (objects in 1 line)<br>(Trials = 5, demonstration = 0)                                                            | All shapes in $\leq 3$ trials                                 | All shapes in 4-5 trials                                         | 1 or 2 shapes                                           | No attempt                                     | Unable to assess |
| 16 | Unscrews lid of box to retrieve raisins<br>(Trials = 2, demonstration=1 if first attempt unsuccessful)                                             | Unscrews lid in first attempt                                 | Unscrews lid after demonstration                                 | Attempts but unsuccessful                               | No attempt                                     | Unable to assess |
| 17 | Puts a raisin precisely inside a small opening in a box<br>(Trials =1, demonstration = 1, test both hands)                                         | Precise release of raisin into box with each hand             | Clumsy release, raisin falls out of bottle with one or more hand | Attempts but unsuccessful release with one or more hand | No attempt                                     | Unable to assess |
| 18 | Thumb-finger tip grasp – grasps raisin between thumb and index finger                                                                              | Precisely grasps                                              | Clumsily grasps                                                  | Grasps                                                  | Tries to                                       | Unable to        |

|    |                                                                                                                                                                   |                                                                                |                                                                                                 |                                                   |                                      |                  |
|----|-------------------------------------------------------------------------------------------------------------------------------------------------------------------|--------------------------------------------------------------------------------|-------------------------------------------------------------------------------------------------|---------------------------------------------------|--------------------------------------|------------------|
|    | <i>(Observed during item above, trials = 0, demonstration = 0)</i>                                                                                                | raisin between thumb & index finger on both hands                              | raisin between thumb & index finger on either hand or both hands                                | the raisin with fingers on one or both hands      | grasp raisin with palm or no attempt | assess           |
| 19 | Child imitates 4 different consonant-vowel combinations e.g. 'dolly' 'baby' 'lorry' 'happy' 'cookie'<br><i>(Trials = 4; can ask child to repeat after mother)</i> | Imitates 3-4 consonant-vowel combinations correctly                            | Imitates 1-2 consonant-vowel combinations correctly                                             | Imitates but not correctly                        | No attempt                           | Unable to assess |
| 20 | Responds to name by interrupting activity (scribbling)<br><i>(Trials = 3, demonstration = 0)</i>                                                                  | Immediately on calling name when engaged in an activity                        | Only when mother calls child's name when child is involved in an activity                       | On repeated calling i.e. 2-3 trials               | Does not respond to name             | Unable to assess |
| 21 | Responds to 'no-no' e.g. stops reaching for an object (more crayons) when you say no-no <i>(Trials = 3, demonstration = 0)</i>                                    | Child stops immediately (may or may not continue reaching after a few seconds) | Child stops on repeating no-no 2-3 times (may or may not continue reaching after a few seconds) | Child does not stop reaching but looks up         | Child does not react to no-no        | Unable to assess |
| 22 | Transfers ball from one hand to another<br><i>(Trials =1, demonstration = 1)</i>                                                                                  | Freely transfers ball from right to left and left to right hands               | Transfers in one direction only                                                                 | Unable to release ball during 1 or more transfers | No attempt                           | Unable to assess |
| 23 | Walks sideways with support<br><i>(Concurrent observation or maternal recall)</i>                                                                                 | Walks 3-4 steps with stepping movements                                        | Walks 1-2 steps with stepping movements                                                         | Stands only (with/with-out)                       | Stands momentarily or no attempt     | Unable to assess |

|    |                                                                                                                              |                                                                                                      |                                                                                                             |                                                                    |                                                               |                  |
|----|------------------------------------------------------------------------------------------------------------------------------|------------------------------------------------------------------------------------------------------|-------------------------------------------------------------------------------------------------------------|--------------------------------------------------------------------|---------------------------------------------------------------|------------------|
|    |                                                                                                                              |                                                                                                      |                                                                                                             | support)                                                           |                                                               |                  |
| 24 | Stands alone for >3 seconds when placed in that position<br>( <i>Concurrent observation/trials = 1</i> )                     | Stands without support for >3 seconds                                                                | Stands without support for <1-3 seconds and then falls/reaches for support                                  | Attempts but cannot stand at all without support                   | No attempt                                                    | Unable to assess |
| 25 | Walks alone<br>( <i>Concurrent observation/maternal recall</i> )                                                             | Walks 5 steps unsupported with stepping movements                                                    | Walks 1-3 steps unsupported with stepping movements                                                         | Walks forward supported by an adult                                | Cannot walk even if supported                                 | Unable to assess |
| 26 | Raises self from sitting to standing position<br>( <i>Concurrent observation/maternal recall</i> )                           | Can stand up himself/herself with support and stay standing for 5 seconds (chair/table/adult's hand) | Can stand up himself/herself with support but cannot stay standing for 5 seconds (chair/table/adult's hand) | Tries to stand up with support but not able to stand up completely | Cannot stand up from sitting position at all, – or no attempt | Unable to assess |
| 27 | Two 2-4 syllable babble such as dada, mama but not specifically to any person or any thing ( <i>Concurrent observation</i> ) | Spontaneously                                                                                        | Mimics                                                                                                      | 1 syllable bable e.g. ma, da, pa                                   | None                                                          | Unable to assess |
| 28 | Uses one meaningful word<br>( <i>Concurrent observation</i> )                                                                | Spontaneously, and in correct context                                                                | Spontaneously, but in incorrect context                                                                     | Mimics on hearing                                                  | Does not use words                                            | Unable to assess |
| 29 | Uses two meaningful words together<br>( <i>Concurrent observation</i> )                                                      | Spontaneously, and in correct context                                                                | Spontaneously, but in incorrect context                                                                     | Mimics on hearing                                                  | Does not use words                                            | Unable to assess |
| 30 | Combines word and gesture when asked                                                                                         | Combines word and gesture                                                                            | Combines word and gesture                                                                                   | Combines word and                                                  | Does not combine                                              | Unable to assess |

|                                                                                             |                                                                                                                                                   |                              |                                |                                          |                  |  |
|---------------------------------------------------------------------------------------------|---------------------------------------------------------------------------------------------------------------------------------------------------|------------------------------|--------------------------------|------------------------------------------|------------------|--|
|                                                                                             | <i>(Do not demonstrate, trials = 3, use different examples each time)</i>                                                                         | completely and appropriately | completely but inappropriately | gesture incompletely but inappropriately | word and gesture |  |
| A                                                                                           | What is the child's native (first) language? <i>(Caregiver report)</i>                                                                            |                              |                                |                                          |                  |  |
| B                                                                                           | Does the child speak/understand any language other than his/her native language? <i>(Caregiver report)</i>                                        |                              |                                |                                          |                  |  |
| C                                                                                           | Is the child exposed to any language other than his/her native language for more than 30 minutes each day on most days? <i>(Caregiver report)</i> |                              |                                |                                          |                  |  |
| D                                                                                           | What is the language in which the assessment is being conducted? <i>(Assessor reported)</i>                                                       |                              |                                |                                          |                  |  |
| <b>How often were the following behaviours observed in the child during the assessment?</b> |                                                                                                                                                   |                              |                                |                                          |                  |  |
| 31                                                                                          | Positive affect                                                                                                                                   | Never or rarely              | Some of the time               | Most of the time                         |                  |  |
| 32                                                                                          | Exploration                                                                                                                                       | Never or rarely              | Some of the time               | Most of the time                         |                  |  |
| 33                                                                                          | Ease of engagement                                                                                                                                | Never or rarely              | Some of the time               | Most of the time                         |                  |  |
| 34                                                                                          | Cooperativeness                                                                                                                                   | Never or rarely              | Some of the time               | Most of the time                         |                  |  |
| 35                                                                                          | Adaptability to change                                                                                                                            | Never or rarely              | Some of the time               | Most of the time                         |                  |  |
| 36                                                                                          | Distractibility                                                                                                                                   | Never or rarely              | Some of the time               | Most of the time                         |                  |  |
| 37                                                                                          | Negative Affect                                                                                                                                   | Never or rarely              | Some of the time               | Most of the time                         |                  |  |
