# Supplementary material for: Construction and validation of the Oxford Neurodevelopment Assessment (OX-NDA) in 1-year-old Brazilian children
Source: PubMed Central journal article supplement (PMC9783969; doi:10.1186/s12887-022-03794-1), 2022-12-23
Supplement: 12887_2022_3794_MOESM4_ESM.pdf [file 12887_2022_3794_MOESM4_ESM.pdf]

## ADDITIONAL FILE 4

Figure S4 Bland-Altman Plots

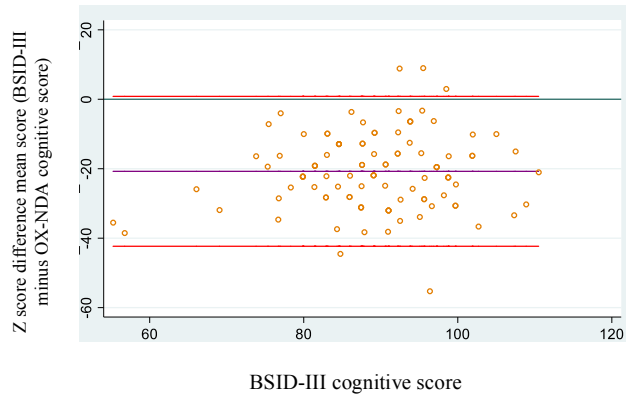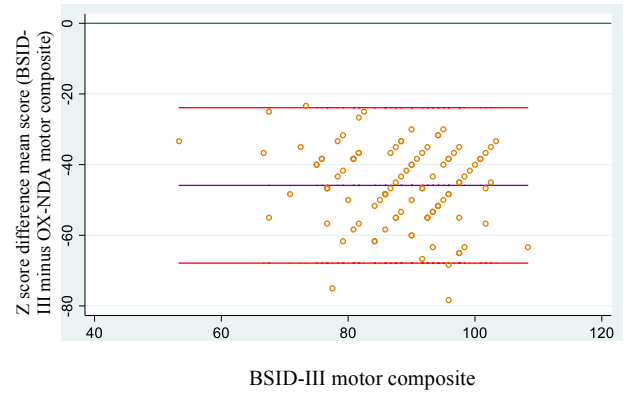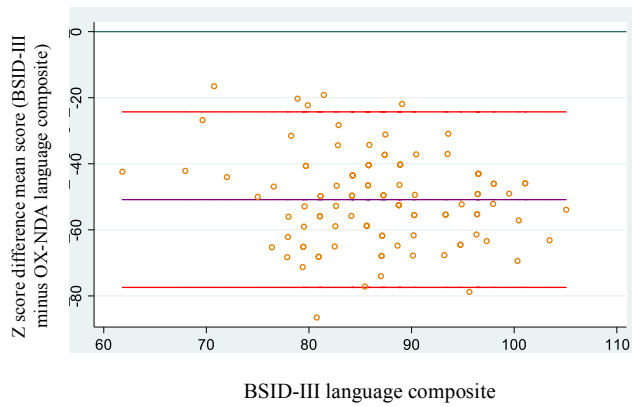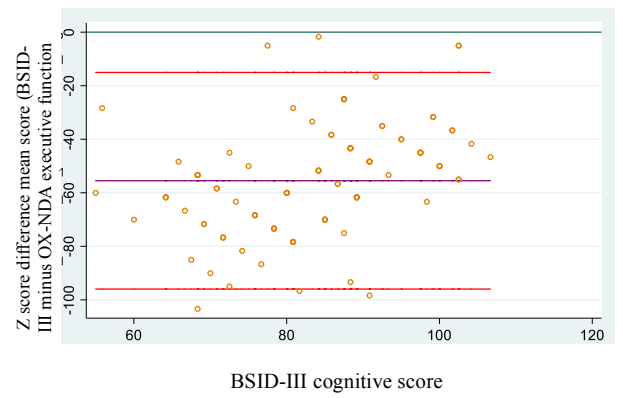

Y=0 line of perfect average agreement  
Purple line = observed average agreement  
Red lines = 95% limits of agreement
