# Supplementary material for: Construction and validation of the Oxford Neurodevelopment Assessment (OX-NDA) in 1-year-old Brazilian children
Source: PubMed Central journal article supplement (PMC9783969; doi:10.1186/s12887-022-03794-1), 2022-12-23
Supplement: 12887_2022_3794_MOESM5_ESM.pdf [file 12887_2022_3794_MOESM5_ESM.pdf]

## ADDITIONAL FILE 5

Table S5 Receiver Operating Characteristics of OX-NDA Domain Scores for Predicting Moderate-to-Severe Delay on the BSID-III (BSID-III composite score 70-85)

| OX-NDA domain score threshold | Sensitivity | Specificity | PPV  | NPV   | LR+  | LR-  | Accuracy |
|-------------------------------|-------------|-------------|------|-------|------|------|----------|
| <b>Cognition</b>              |             |             |      |       |      |      |          |
| ≤53                           | 0.94        | 0.50        | 0.98 | 0.25  | 1.88 | 0.12 | 0.72     |
| ≤54                           | 0.88        | 0.50        | 0.98 | 0.14  | 1.76 | 0.24 | 0.69     |
| ≤56                           | 0.84        | 0.75        | 0.99 | 0.16  | 3.36 | 0.21 | 0.80     |
| ≤57                           | 0.79        | 0.75        | 0.99 | 0.13  | 3.16 | 0.28 | 0.77     |
| ≤59                           | 0.76        | 0.75        | 0.98 | 0.11  | 3.04 | 0.32 | 0.76     |
| ≤60                           | 0.76        | 0.75        | 0.98 | 0.11  | 3.04 | 0.32 | 0.76     |
| ≤62                           | 0.60        | 1.00        | 1.00 | 0.009 | .    | 0.40 | 0.80     |
| ≤64                           | 0.56        | 1.00        | 1.00 | 0.008 | .    | 0.44 | 0.78     |
| <b>Motor</b>                  |             |             |      |       |      |      |          |
| ≤70                           | 0.85        | 0.70        | 0.96 | 0.33  | 2.84 | 0.21 | 0.78     |
| ≤73                           | 0.73        | 0.80        | 0.97 | 0.24  | 3.67 | 0.33 | 0.77     |
| ≤76                           | 0.66        | 1.00        | 1.00 | 0.24  | .    | 0.34 | 0.83     |
| ≤79                           | 0.51        | 1.00        | 1.00 | 0.18  | .    | 0.49 | 0.76     |
| ≤82                           | 0.41        | 1.00        | 1.00 | 0.15  | .    | 0.59 | 0.71     |
| <b>Language</b>               |             |             |      |       |      |      |          |
| ≤57                           | 0.36        | 0.33        | 0.95 | 0.01  | 0.54 | 1.93 | 0.35     |
| ≤60                           | 0.43        | 0.33        | 0.96 | 0.02  | 0.64 | 1.72 | 0.38     |
| ≤63                           | 0.57        | 0           | 0.95 | 0     | 0.57 | 0    | 0.29     |
| ≤66                           | 0.68        | 0           | 0.96 | 0     | 0.68 | 0    | 0.34     |
| ≤69                           | 0.80        | 0           | 0.96 | 0     | 0.80 | 0    | 0.40     |
| ≤72                           | 0.88        | 0           | 0.97 | 0     | 0.88 | 0    | 0.44     |

OX-NDA: The Oxford Neurodevelopment Assessment; PPV: Positive predictive value; NPV: Negative predictive value; LR+: Positive likelihood ratio; LR-: Negative likelihood ratio. Shaded rows represent selected thresholds.
